# Supplementary material for: Comprehensive Analysis of Clinicopathological and Molecular Features to Predict Anti-PD-1-Based Therapy Efficacy in Patients with Advanced Gastric Signet Ring Cell Carcinoma
Source: MDPI journal article supplement (doi:10.3390/jpm13010115), 2023-01-04
Supplement: s1 [file s1]

**Table S1. Patient's baseline clinicopathological characteristics**

| Characteristics           |                           | Number     |
|---------------------------|---------------------------|------------|
| Age                       | Median (Range)            | 52 (29-78) |
| Gender                    | Male                      | 47 (66.1%) |
|                           | Female                    | 24 (33.9%) |
| Race                      | Asian                     | 71 (100%)  |
| ECOG performance status   | 0                         | 21 (29.5%) |
|                           | 1                         | 32 (45.0%) |
|                           | 2                         | 18 (25.5%) |
| Primary tumor location    | EGJ/Cardia                | 13 (18.3%) |
|                           | Body                      | 32 (45.0%) |
|                           | Antrum                    | 22 (30.9%) |
|                           | Unknown                   | 4 (5.8%)   |
| Histological grade        | Moderately differentiated | 2 (2.8%)   |
|                           | Poorly differentiated     | 65 (91.5%) |
|                           | Unknown                   | 4 (5.4%)   |
| Lauren Classification     | Intestinal                | 0 (0.0%)   |
|                           | Diffuse                   | 64 (90.1%) |
|                           | Mixed                     | 7 (9.9%)   |
| Metastatic sites          | Lymph nodes               | 37 (52.1%) |
|                           | Peritoneum                | 27 (38.0%) |
|                           | Liver                     | 15 (21.1%) |
|                           | Bone                      | 5 (7.0%)   |
|                           | Others                    | 12 (16.9%) |
| Previous gastrectomy      | Yes                       | 8 (11.2%)  |
|                           | No                        | 63 (88.8%) |
| HER-2 status              | Positive                  | 4 (5.6%)   |
|                           | Negative                  | 67 (94.4%) |
| EBV in situ hybridization | Positive                  | 5 (7.0%)   |
|                           | Negative                  | 64 (90.1%) |
|                           | Unknown                   | 2 (2.9%)   |
| MSI/MMR testing           | MSI-H/dMMR                | 4 (5.6%)   |
|                           | MSI-L/MSS/pMMR            | 67 (94.4%) |
| PD-L1 status              | CPS $\geq$ 5              | 31 (43.6%) |
|                           | CPS<5                     | 27 (56.4%) |

Abbreviations: ECOG, Eastern Cooperative Oncology Group; EGJ, esophagogastric junction; EBV, Epstein-Barr virus; MSI, microsatellite instability; MMR, mismatch repair; MSI-H, high-level microsatellite instability; MSI-L, low-level microsatellite instability; dMMR, deficient mismatch repair; pMMR, proficient mismatch repair; PD-L1, programmed cell death ligand 1.

**Table S2.** Univariate and multivariate analyses of predictors for progression-free survival in SRCC patients

| Characteristics            | Univariate analysis                   |                     | Multivariate analysis                 |                    |
|----------------------------|---------------------------------------|---------------------|---------------------------------------|--------------------|
|                            | HR <sup>b</sup> (95%CI <sup>c</sup> ) | <i>P</i>            | HR <sup>b</sup> (95%CI <sup>c</sup> ) | <i>P</i>           |
| Age                        | 1.07(0.88-1.78)                       | 0.236               | -                                     | -                  |
| Gender                     | 1.13(0.97-1.59)                       | 0.356               | -                                     | -                  |
| ECOG PS                    | 1.36(0.95-1.86)                       | 0.086               | -                                     | -                  |
| Tumor location             | 0.87(0.78-1.17)                       | 0.426               | -                                     | -                  |
| Differentiation            | 1.04(0.96-1.26)                       | 0.247               | -                                     | -                  |
| Lymph node metastasis only | 0.27(0.14-0.52)                       | <0.001 <sup>a</sup> | 0.87(0.52-0.91)                       | 0.035 <sup>a</sup> |
| PD-L1 CPS $\geq$ 5         | 0.24(0.13-0.47)                       | <0.001 <sup>a</sup> | 0.85(0.46-0.97)                       | 0.041 <sup>a</sup> |
| dMMR                       | 0.29(0.12-0.71)                       | 0.0095 <sup>a</sup> | 0.75(0.44-0.86)                       | 0.021 <sup>a</sup> |
| CDH1 wild type             | 0.08(0.03-0.24)                       | <0.001 <sup>a</sup> | 0.41(0.25-0.76)                       | 0.019 <sup>a</sup> |

<sup>a</sup>*P* < 0.05.

<sup>b</sup>HR, hazard ratio.

<sup>c</sup>CI, confidence interval.

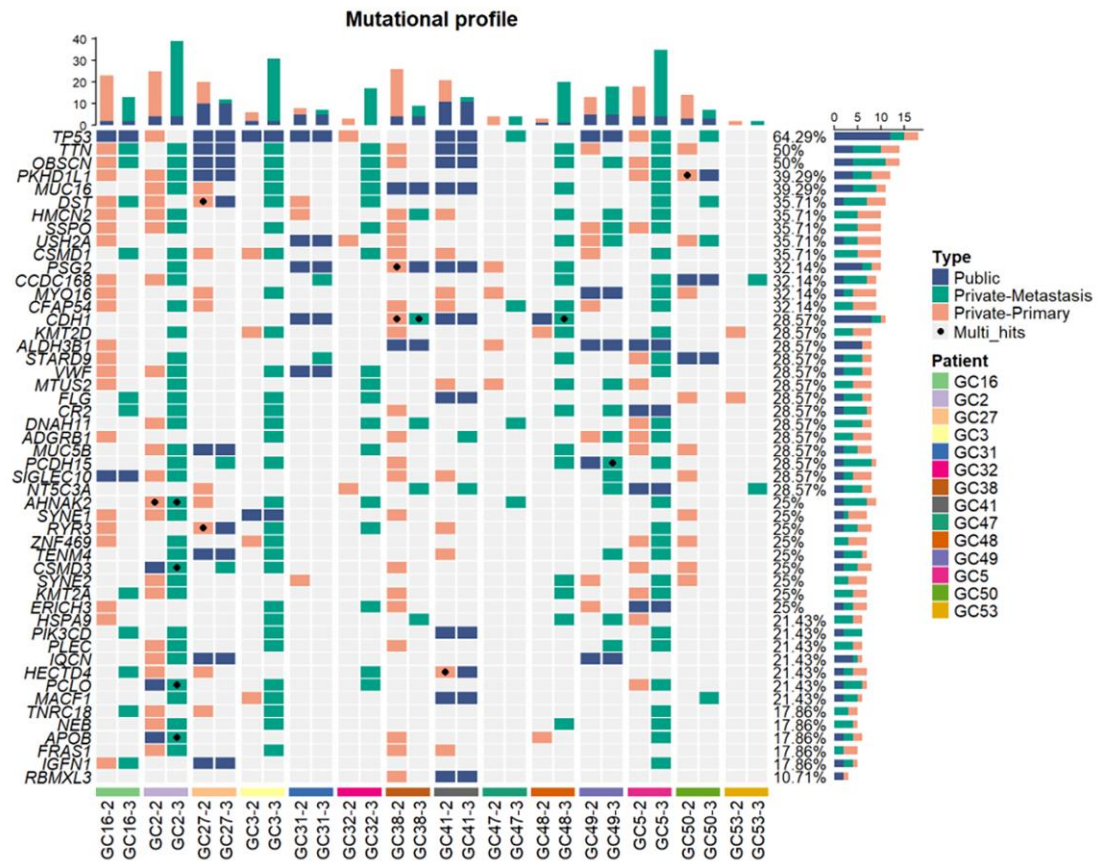

**Figure S1.** Comparison of gene mutations between 14 paired primary and metastatic tissues using McNemar's test ( $P > 0.05$ ).

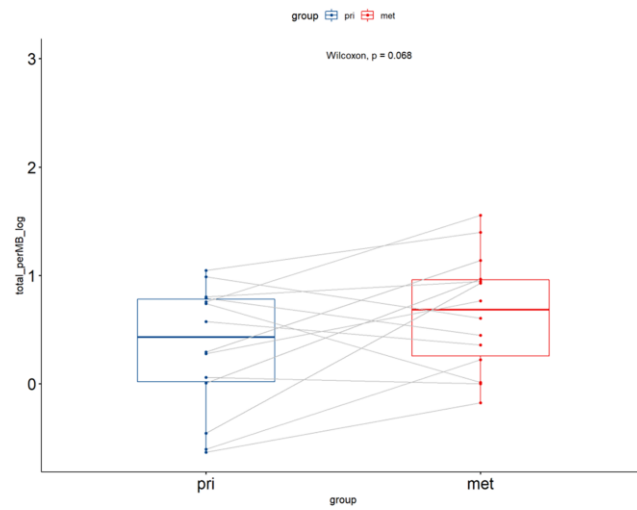

**Figure S2.** Comparison of median TMB between primary and metastatic tissues (Wilcoxon test,  $P = 0.068$ ).

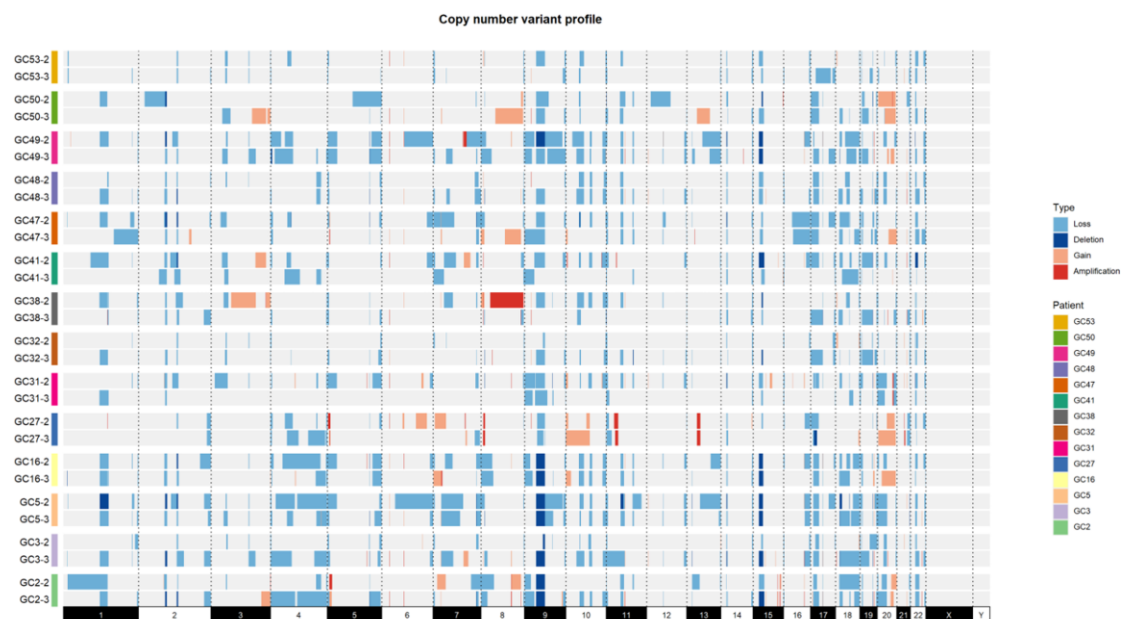

**Figure S3.** Copy number variations detected in the paired primary and metastatic tumor tissues.
